# Supplementary material for: Feasibility analysis of using inverse modeling for estimating field-scale evapotranspiration in maize and soybean fields from soil water content monitoring networks
Source: Copernicus journal article supplement (doi:10.5194/hess-21-1263-2017), 2017-03-02
Supplement: Supplementary file 1 [file hess-21-1263-2017-supplement.zip]

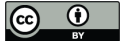

## *Supplement of*

# **Feasibility analysis of using inverse modeling for estimating field-scale evapotranspiration in maize and soybean fields from soil water content monitoring networks**

**Foad Foolad et al.**

*Correspondence to:* Trenton E. Franz (tfranz70@gmail.com)

- hess-21-1263-2017-supplement-title-page.pdf
- Supplemental Figure Captions.pdf
- f01S.tif
- f02S.tif
- f03S.tif
- f04S.tif

The copyright of individual parts of the supplement might differ from the CC-BY 3.0 licence.
